# Supplementary material
Source: PubMed Central journal article supplement (PMC2770795)
Supplement: 90507.2008_1.pdf [file 90507.2008_1.pdf]

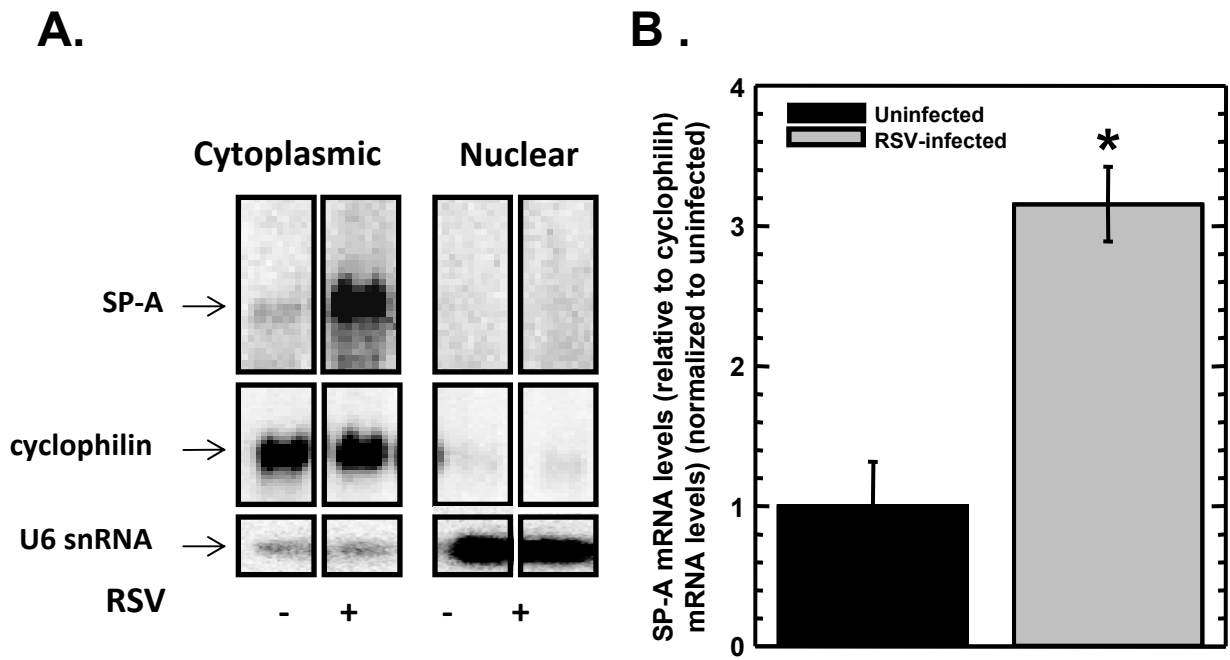

Figure 1

**A.**

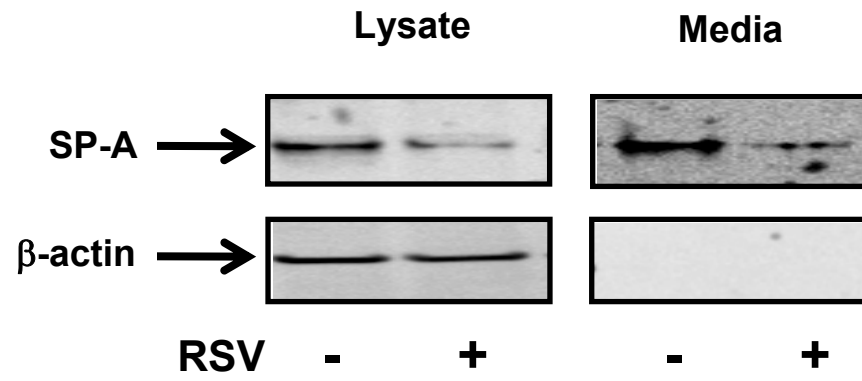

**B.**

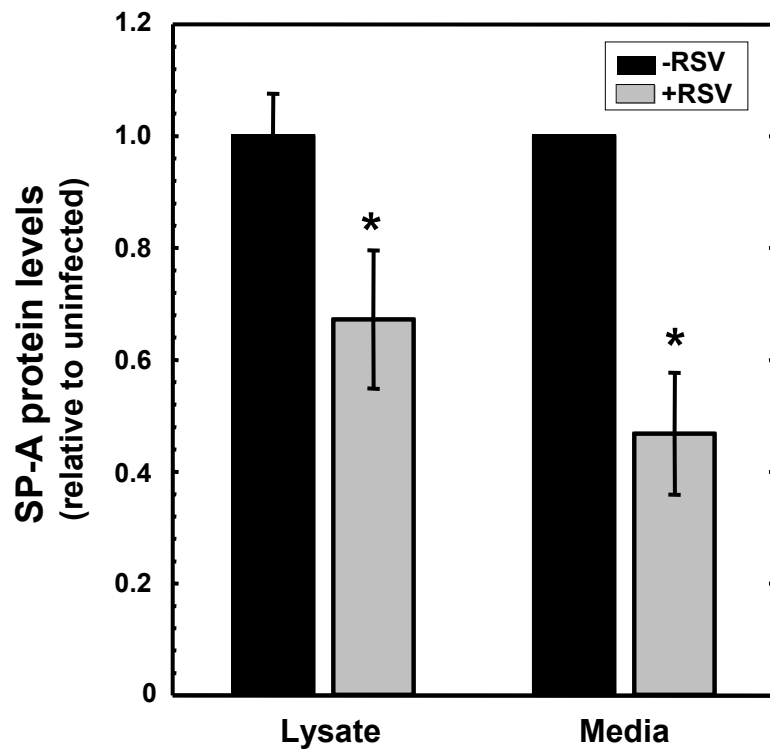

**Figure 2**

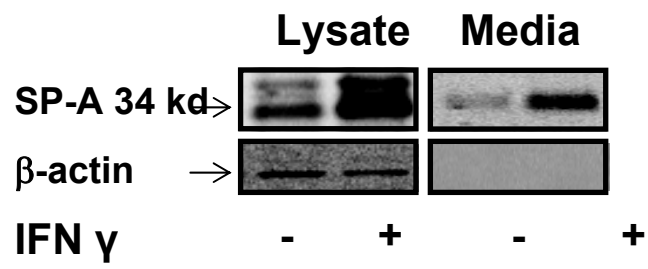

Figure 3

## REVISED FIGURE LEGENDS

**Figure 1. Steady-state SP-A mRNA levels in NCI-H441 cells increase in the presence of RSV infection, but SP-A mRNA processing or nuclear export is not altered.** NCI-H441 cells were treated in the absence (-) or presence (+) of RSV (MOI = 1) for 2 h. At 24 h post-RSV infection, the nuclear and cytoplasmic fractions of the cells were isolated, after which RNA was harvested from the fractions and equal amounts subjected to Northern analysis. **A.** Representative autoradiographs showing steady-state levels of SP-A mRNA, cyclophilin A mRNA and nucleus-specific U6 snRNA. **Shown are individual lanes from a single gel.** **B.** Graphical representation of steady-state levels of cytoplasmic SP-A mRNA (relative to cyclophilin A mRNA levels) with levels from uninfected cells normalized as 1. Experiments were performed in triplicate (N = 6). The asterisk indicates significance by t-test (P < 0.01).

**Figure 2. Steady-state cellular and secreted SP-A levels in NCI-H441 cells decrease in the presence of RSV infection.** NCI-H441 cells were treated in the absence (-) or presence (+) of RSV (MOI = 1) for 2 h. At 24 h post-RSV infection, cellular protein and media were isolated and equal amounts subjected to Western analysis. **A.** Representative immunoblots showing steady-state levels of SP-A protein and  $\beta$ -actin protein from lysates and media. The lysates and media were run on separate gels. **B.** Graphical representation of steady-state levels of the SP-A protein from lysates and media. Equal amounts of lysates were normalized to  $\beta$ -actin protein. The average of SP-A protein in the absence of RSV is set to 1. The normalized average of SP-A protein in the presence of RSV is shown as a ratio relative to normalized SP-A protein level in the absence of RSV. Equal volumes of media from H441 cells incubated in the absence or presence of RSV were quantified for SP-A protein. For each experiment the level of SP-A protein in the absence of RSV is set to 1. The level of SP-A protein in the presence of RSV is shown as a ratio relative to SP-A protein level in the absence

of RSV. Experiments were performed in triplicate (N = 10). The asterisk indicates significance by t-test ( $P < 0.01$ ) for cell lysates and by the paired t-test ( $P < 0.01$ ) for media.

**Figure 3. IFN- $\gamma$  increases SP-A protein levels in NCI-H441 cells.** NCI-H441 cells were treated in the absence (-) or presence (+) of IFN- $\gamma$  for 20 hrs. Media and cellular lysates were harvested and subjected to westernblot analysis for SP-A protein. For normalization of the cellular SP-A protein the blots were reprobbed with an antibody against  $\beta$ -actin. A representative blot is shown indicating that IFN- $\gamma$  treatment increases the level of SP-A protein both intracellularly and extracellularly. The lysates and media were run on separate gels.
